# Supplementary material for: BdCV1-Encoded P3 Silencing Suppressor Identification and Its Roles in Botryosphaeria dothidea, Causing Pear Ring Rot Disease
Source: MDPI journal article supplement (doi:10.3390/cells12192386), 2023-09-29
Supplement: s1 [file s1]

**Table S1** The primers information in this work

| Primer name    | Sequence (5'-3')                                   | Function                                                |
|----------------|----------------------------------------------------|---------------------------------------------------------|
| RdRp F         | ATGTCAGCCACACTAGGTGCTT                             | Fragment amplification                                  |
| RdRp R         | TTAGTAGTACATGTAACC                                 |                                                         |
| CP F           | ATGACTTCCGCCGACAAC                                 |                                                         |
| CP R           | TCATGATGCCACTAACAC                                 |                                                         |
| P3 F           | ATGGCCTCCTACGAACAAC                                |                                                         |
| P3 R           | TCACACGAGTTGGCGCAT                                 |                                                         |
| P4 F           | ATGAGTTTCACTCGTGACC                                |                                                         |
| P4 R           | TTATGGCAATACACCACGC                                |                                                         |
| pCNF3-RdRp F   | ACCATTTACGAACGATAGCATCTAGAATGT<br>CAGCCACACTAGGTGC | Vector construction                                     |
| pCNF3-RdRp R   | CGGATCCACTAGTAGGCCTTCTAGAGTAG<br>TACATGTAACCATCG   |                                                         |
| pCNF3-CP F     | AAAACTAGTATGACTTCCGCCGACAAC                        |                                                         |
| pCNF3-CP R     | CGGGGTACCTGATGCCACTAACACTATCTC<br>G                |                                                         |
| pCNF3-P3 F     | ACCATTTACGAACGATAGCATCTAGAATG<br>GCCTCCTACGAACAAC  |                                                         |
| pCNF3-P3 R     | CGGATCCACTAGTAGGCCTTCTAGATCAC<br>ACGAGTTGGCGCAT    |                                                         |
| pCNF3-P4 F     | TGCTCTAGAATGAGTTTCACTCGTGACCC                      |                                                         |
| pCNF3-P4 R     | CGGGGTACCTGGCAATACACCACGCATG                       |                                                         |
| pDL2-P3 F      | GTAGGAACCCAATCTTCAAAATGGCCTCC<br>TACGAACAAC        |                                                         |
| pDL2-P3 R      | TGAATGTTGAGTGGAATGATTCACACGAG<br>TTGGCGCAT         |                                                         |
| P3-J F         | GGCCAGTGGTAACGGCAA                                 |                                                         |
| P3-J R         | AAGCGGCCCAGTCCGGAGCA                               |                                                         |
| pDL2-mexp-JC F | CGTTGTGCGCCTAACAGATC                               | RT-qPCR for gene<br>expression level analysis<br>of PRs |
| pDL2-mexp-JC R | GGGTATTGCCTTTGGACTT                                |                                                         |
| NbPR1 F        | CATAACACAGCTCGTGCAGATGTA                           |                                                         |
| NbPR1 R        | ACCTGGAGGATCATAGTTGCAAGAG                          |                                                         |
| NbPR2 F        | CATAACCTTCCACTCTTA                                 |                                                         |
| NbPR2 R        | GATACAATAATCTCCACATT                               |                                                         |
| NbPR5 F        | ATTCGGAGGACAACAATA                                 |                                                         |
| NbPR5 R        | GTGCTAGTAGGATCATCTT                                |                                                         |
| NbPR4 F        | GAACAGTCCAGGCTCGCATT                               |                                                         |
| NbPR4 R        | CCGTTACAGTCTCCAGTCTCA                              |                                                         |
| GAPDH F        | GCAGTGAACGACCCATTTATCTC                            |                                                         |
| GAPDH R        | AACCTTCTTGGCACCACCCT                               |                                                         |
| AGO1 F         | CACAACAAAGCCCGTCTGGAG                              |                                                         |

|             |                                                        |                                                                                 |
|-------------|--------------------------------------------------------|---------------------------------------------------------------------------------|
| AGO1 R      | GAATCAGAACCTTGCCCCGACT                                 | RT-qPCR for gene expression level analysis of RNAi components                   |
| Dicer2 F    | GGCTGAGATGGTCGAGGAG                                    |                                                                                 |
| Dicer2 R    | CTTGCTGATGGCAGAGGGT                                    |                                                                                 |
| BdActin F   | CCGCTCCGTTTCTATGCTCT                                   |                                                                                 |
| BdActin R   | ACCCTCACCGACATACCAGT                                   |                                                                                 |
| vsRNA3 RT   | GTCGTATCCAGTGCAGGGTCCGAGGTATT<br>CGCACTGGATACGACCCTTAG | PCR fragment amplification and RT-qPCR analysis of vsRNAs                       |
| vsRNA3 F    | GGCCTCCTGATGTTTCGGCTCTA                                |                                                                                 |
| vsRNA10 RT  | GTCGTATCCAGTGCAGGGTCCGAGGTATT<br>CGCACTGGATACGACTGTCTG |                                                                                 |
| vsRNA10 F   | GGCCTTGTATTGAATGCC                                     |                                                                                 |
| vsRNA13 RT  | GTCGTATCCAGTGCAGGGTCCGAGGTATT<br>CGCACTGGATACGACACGCCA |                                                                                 |
| vsRNA13 F   | GGCCATTGCGACATGAT                                      |                                                                                 |
| vsRNA15 RT  | GTCGTATCCAGTGCAGGGTCCGAGGTATT<br>CGCACTGGATACGACCTGGAT |                                                                                 |
| vsRNA15 F   | GCCCAAAGGCCAGTTCGTGG                                   |                                                                                 |
| Stem loop R | GTGCAGGGTCCGAGGT                                       |                                                                                 |
| GME9697 F   | TACTTCCATGCCGCGCTA                                     | RT-qPCR for mRNA expression level analysis of selected genes from transcriptome |
| GME9697 R   | AACTCCAGCCGCGAAGTA                                     |                                                                                 |
| GME3341 F   | AGGACCAGCCAATTCCCA                                     |                                                                                 |
| GME3341 R   | ATCCAGCGTCCAGCAACC                                     |                                                                                 |
| GME1582 F   | GTCTCAGATGTCCTCGGC                                     |                                                                                 |
| GME1582 R   | ATGCGCGAGAATCCACAC                                     |                                                                                 |
| GME14201 F  | TCGATCCGTTGGCCGATATG                                   |                                                                                 |
| GME14201 R  | CTCGACTTCAGACGCGATCA                                   |                                                                                 |
| GME1548 F   | AACGTGGAGGGGATCGAG                                     |                                                                                 |
| GME1548 R   | TGCCTCTGGTACTGCCTG                                     |                                                                                 |
| GME13602 F  | GAGCCGGTCCAAAACCCATA                                   |                                                                                 |
| GME13620 R  | CCAGCTTGACACCGGATTCT                                   |                                                                                 |
| GME9360 F   | TTCCGGGATAACCAGCCCTAA                                  |                                                                                 |
| GME9360 R   | CTGTTGGCGAATGTATGCGG                                   |                                                                                 |

**Table S2** The phenotype of 35S-GFP + P3, 35S-GFP + P19 and 35S-GFP + EV infiltrated *N. benthamiana* line 16c leaves

| Infiltration treatment | Infiltrated leaves | Necrotic leaves |
|------------------------|--------------------|-----------------|
| 35S-GFP+P3             | 35                 | 35              |
| 35S-GFP+P19            | 17                 | 1               |
| 35S-GFP+EV             | 13                 | 0               |

**Table S3** The quality statistical analysis reads filtered from raw reads of *B. dothidea* by RNA-Seq

| Sample  | Total Raw<br>reads (Mb) | Total<br>Clean<br>reads (Mb) | Total<br>Clean<br>Bases<br>(Gb) | Clean<br>reads<br>Q20(%) | Clean<br>reads<br>Q30(%) | Clean<br>reads<br>Ratio(%) |
|---------|-------------------------|------------------------------|---------------------------------|--------------------------|--------------------------|----------------------------|
| LW-VF 1 | 43.69                   | 42.44                        | 6.37                            | 98.25                    | 93.22                    | 97.14                      |
| LW-VF 2 | 43.69                   | 42.45                        | 6.37                            | 98.59                    | 94.59                    | 97.16                      |
| OE3 1   | 43.69                   | 42.73                        | 6.41                            | 98.43                    | 93.98                    | 97.8                       |
| OE3 2   | 43.69                   | 42.34                        | 6.35                            | 98.49                    | 94.22                    | 96.91                      |

**Table S4** Sequencing information of vsiRNA

| Name     | Polar | Position  | Sequence (5'-3')           | Length |
|----------|-------|-----------|----------------------------|--------|
| vsiRNA3  | +     | 2222-2247 | TCCTGATGTTCGGCTCTACGCTAAGG | 26 bp  |
| vsiRNA10 | -     | 77-98     | TTGTATTGAATGCCTGCAGACA     | 22 bp  |
| vsiRNA13 | +     | 946-966   | ATTGCGACATGATGCTGGCGT      | 21 bp  |
| vsiRN15  | +     | 1836-1859 | AAAGGCCAGTTCGTGGGGATCCAG   | 24 bp  |
